# Supplementary material for: Cortico-autonomic local arousals and heightened somatosensory arousability during NREMS of mice in neuropathic pain
Source: eLife journal article supplement (doi:10.7554/elife.65835), 2021-07-06
Supplement: fig1-data1 [file Fig6_S1E_Prop.xlsx]

## Sheet: Feuil1
SNI	Prop
0	0.2993
0	0.39
0	0.3382
0	0.3846
0	0.2887
0	0.277
0	0.3614
0	0.4167
0	0.3435
0	0.2885
0	0.3092
1	0.3294
1	0.2873
1	0.3885
1	0.3579
1	0.4329
1	0.3394
1	0.3071
1	0.276
1	0.3682
1	0.3502
1	0.3831
1	0.3291
