# Supplementary figures and images for: Cortico-autonomic local arousals and heightened somatosensory arousability during NREMS of mice in neuropathic pain
Source: eLife journal article supplement (doi:10.7554/elife.65835), 2021-07-06

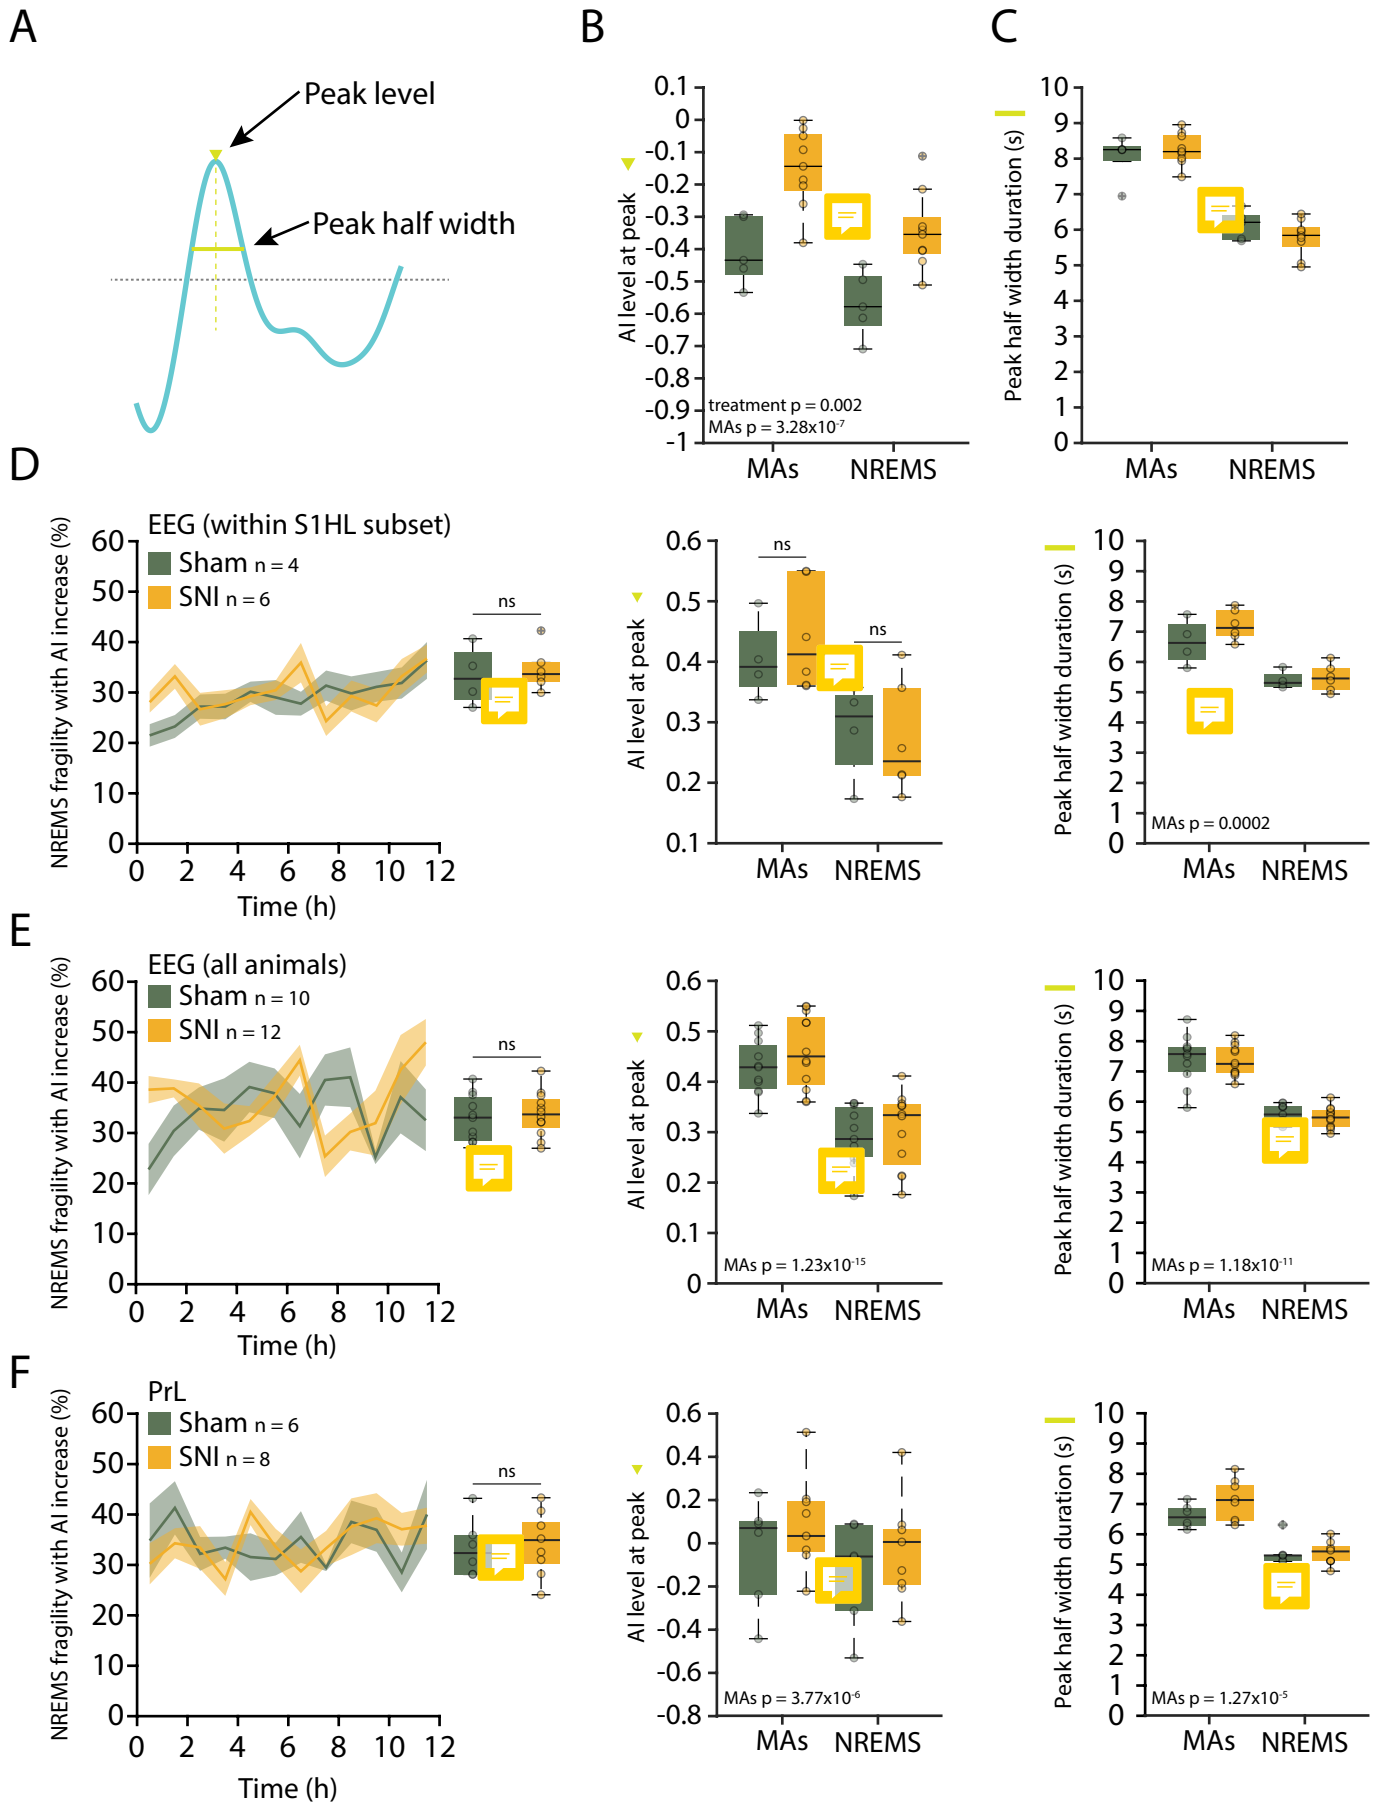

Supplement: fig1-data1 [file elife-65835-fig1-data1-v3.zip]

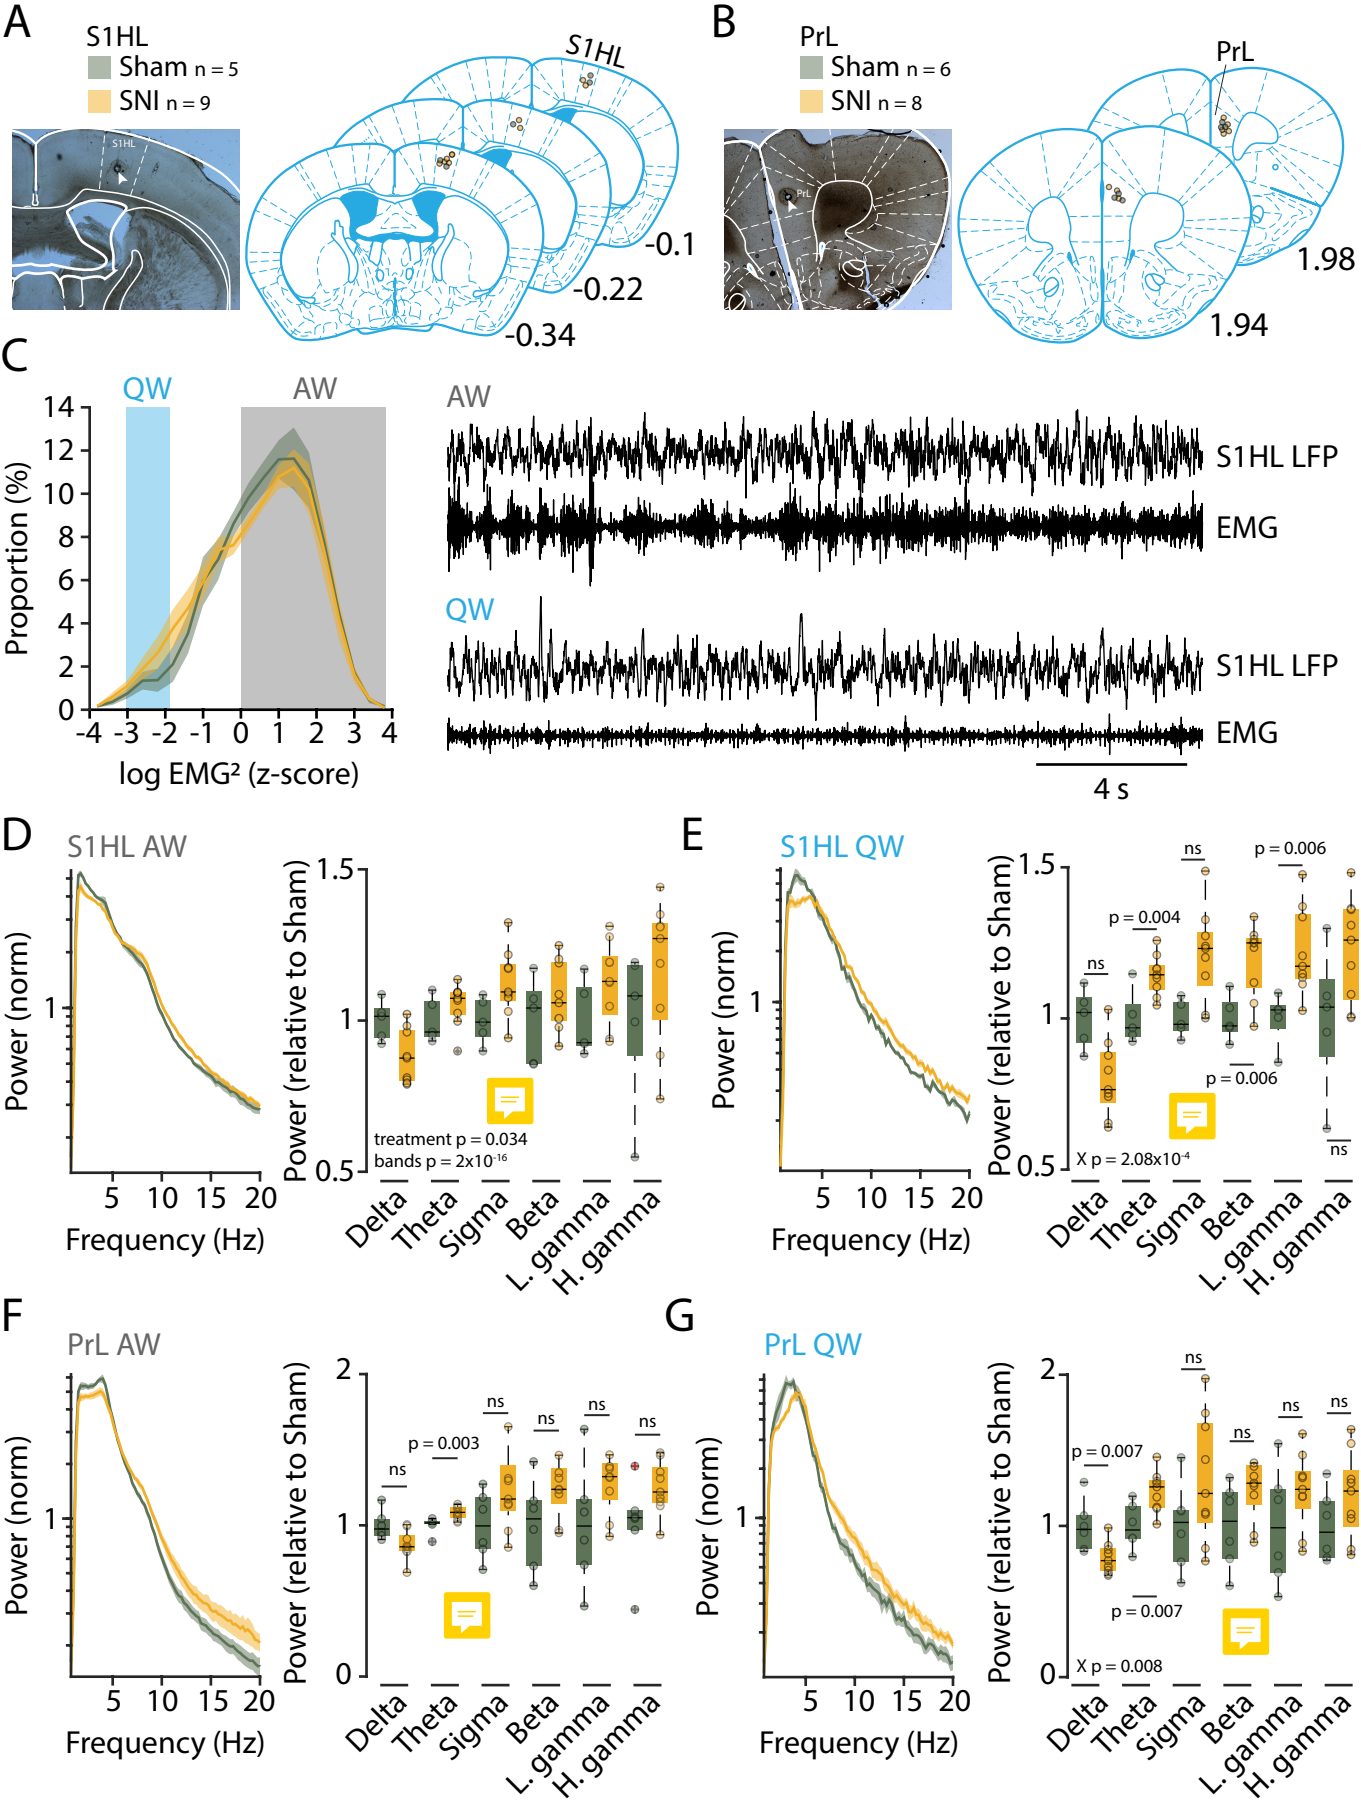

Supplement: fig2-data1 [file Figure_2.pdf › Figure_2/Figure_2.pdf]

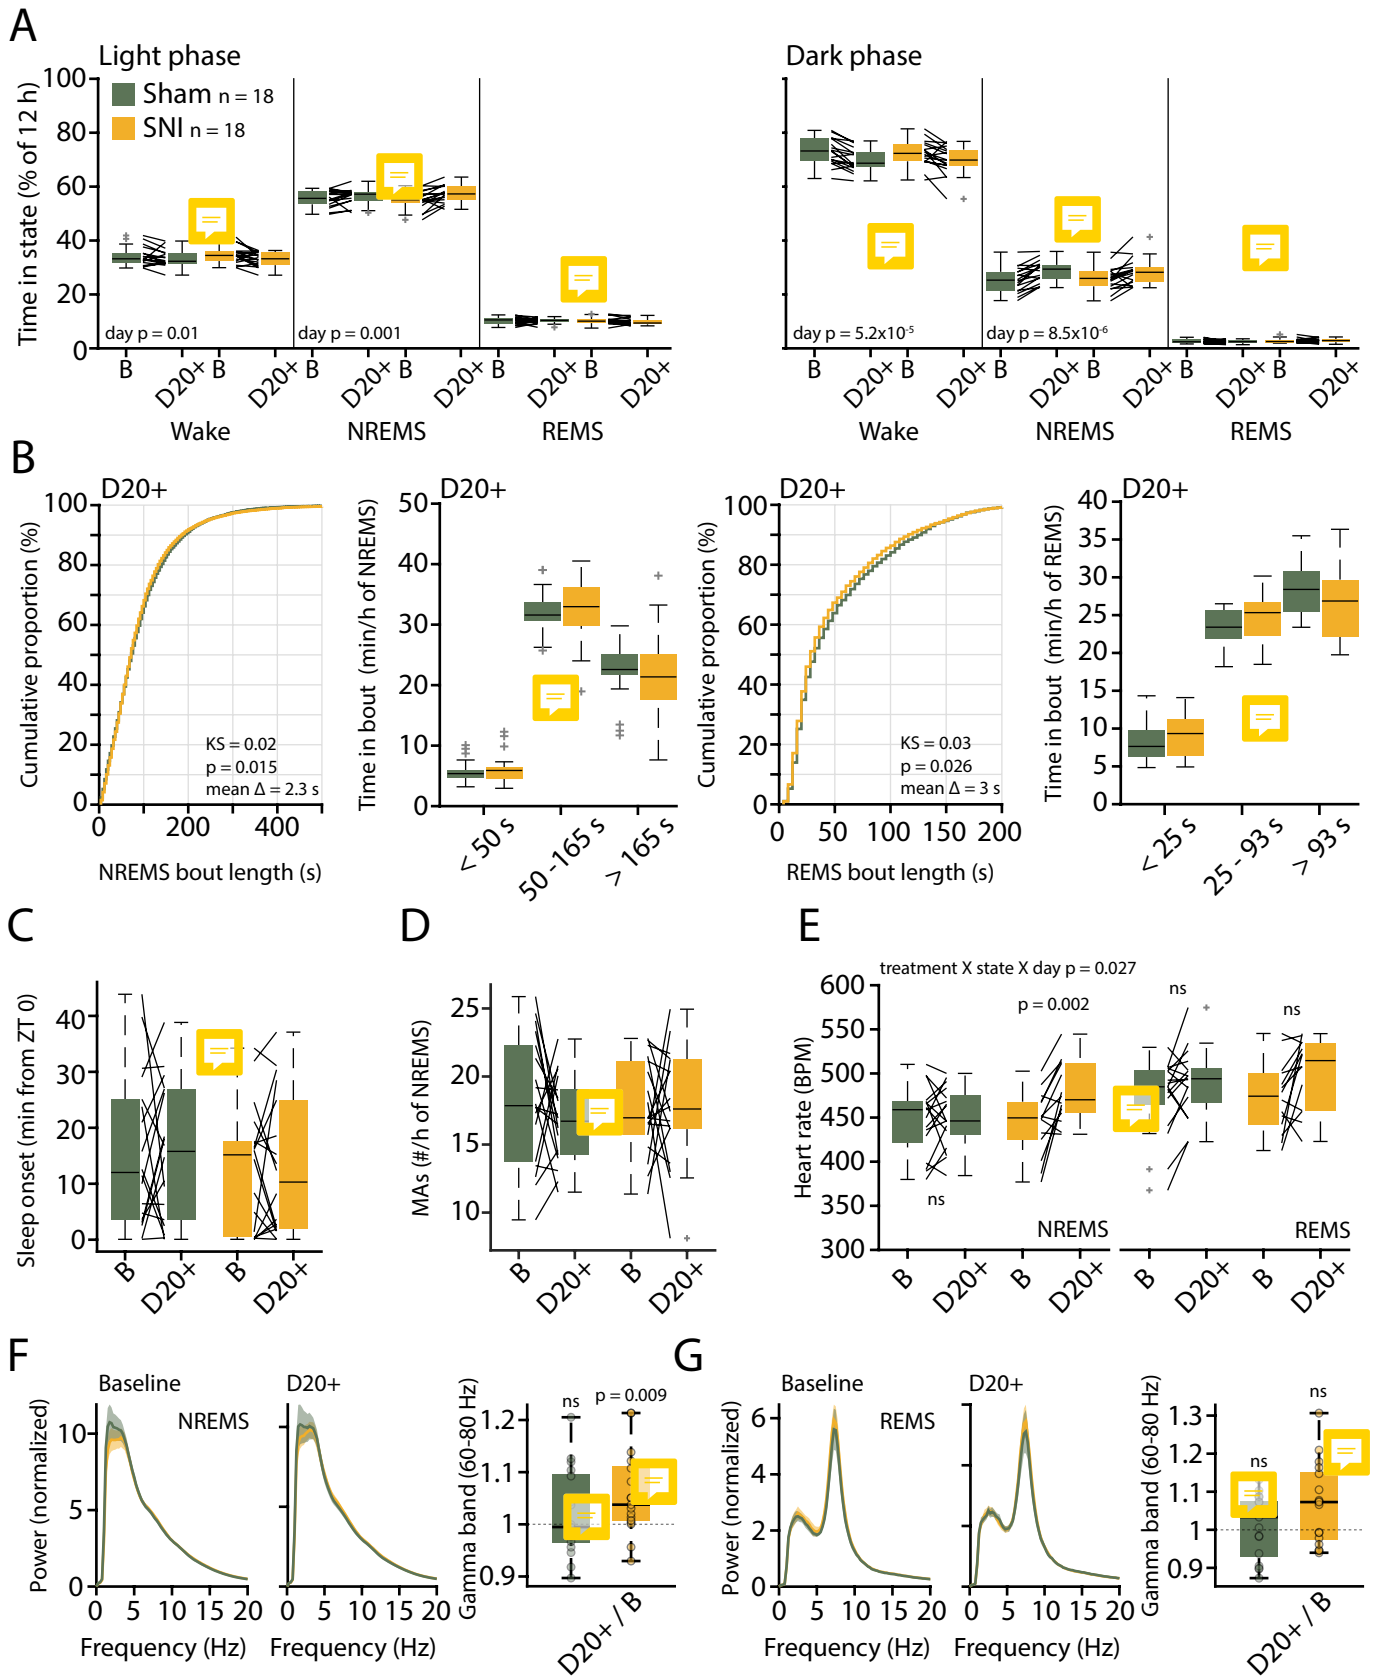

Supplement: fig3-data1 [file Figure_3_SleepInSNI.pdf › Figure_3/Figure_3_SleepInSNI.pdf]

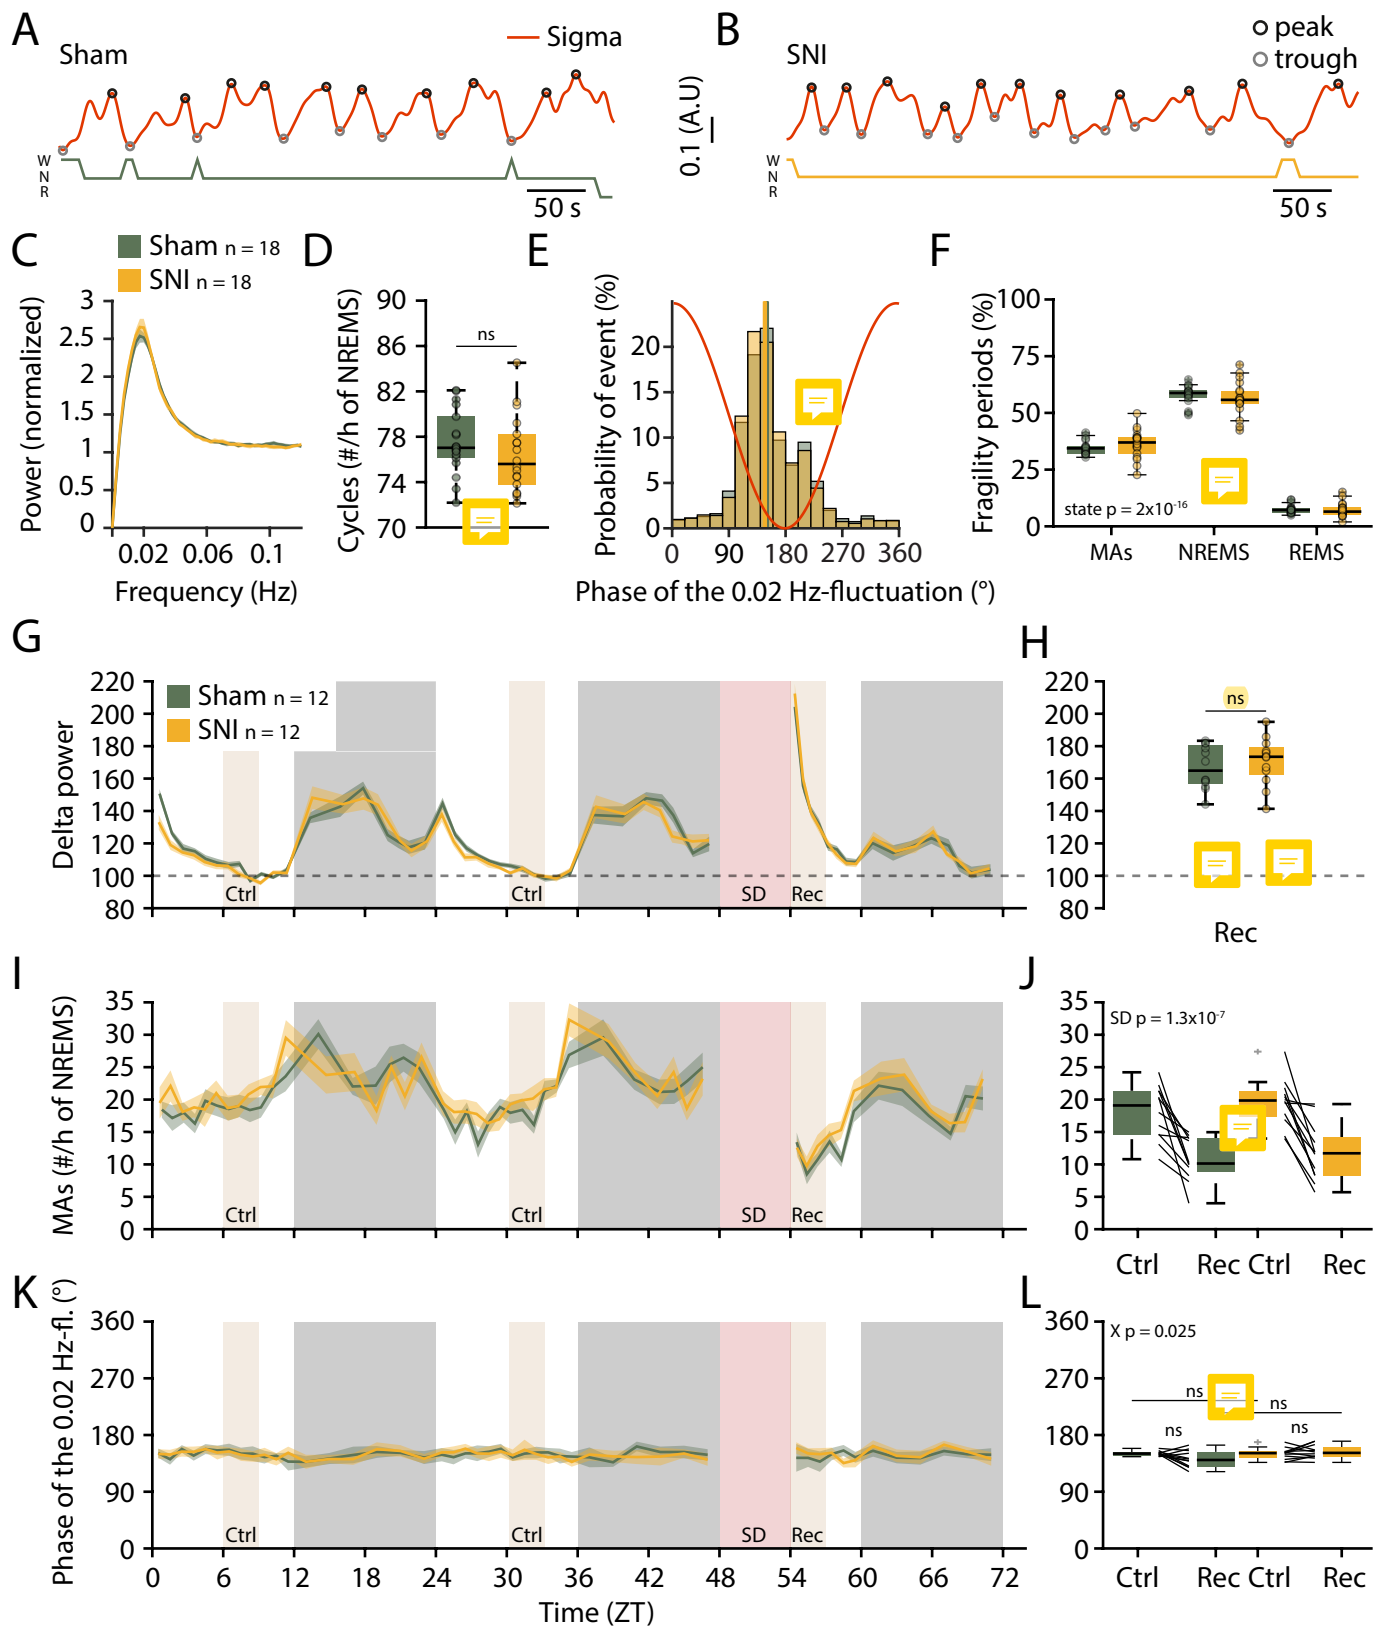

Supplement: fig4-data1 [file elife-65835-fig4-data1-v3.zip]

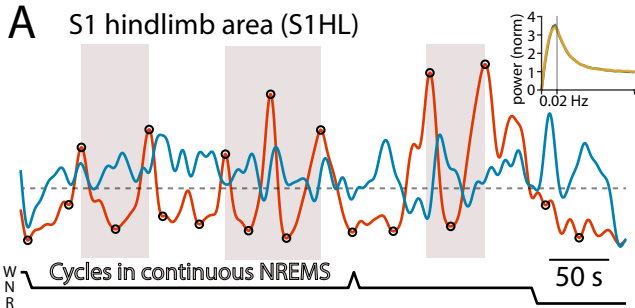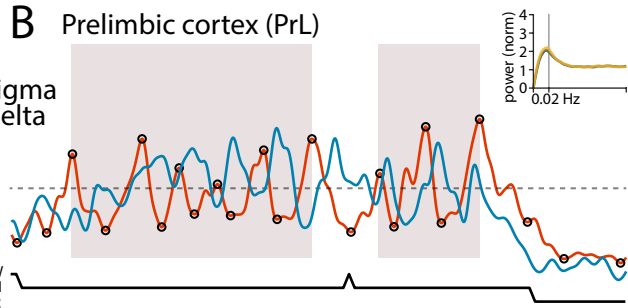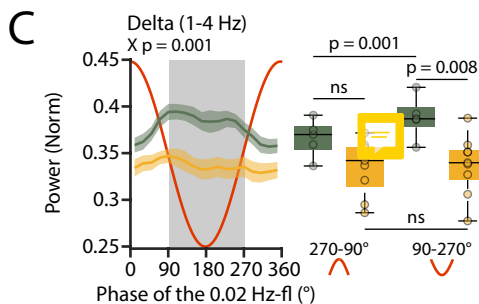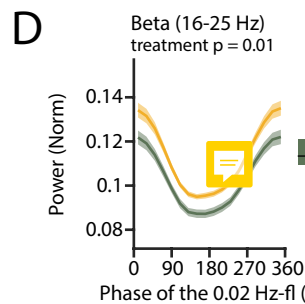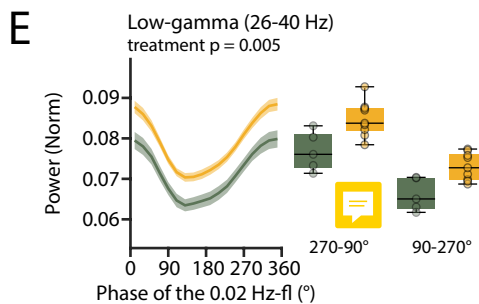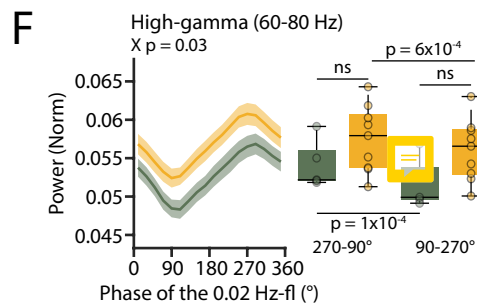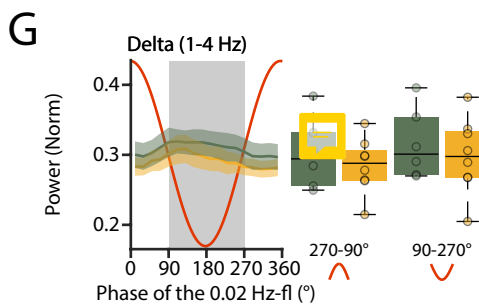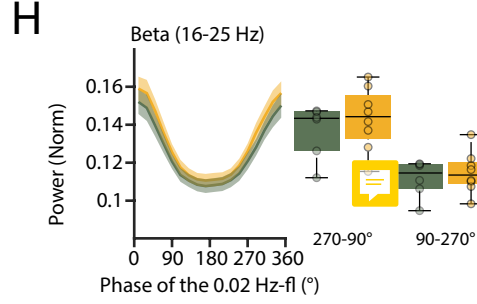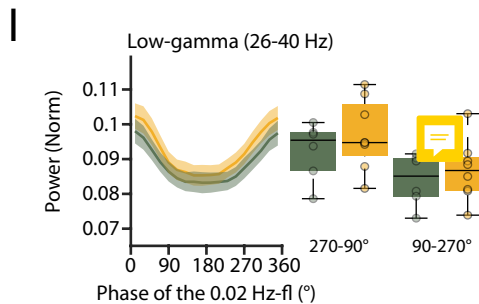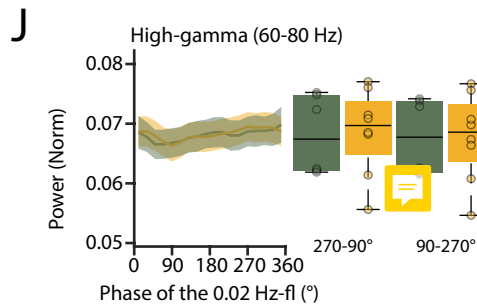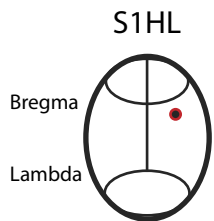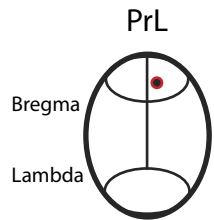

Supplement: fig5-data1 [file Figure_5.pdf › Figure_5/Figure_5.pdf]

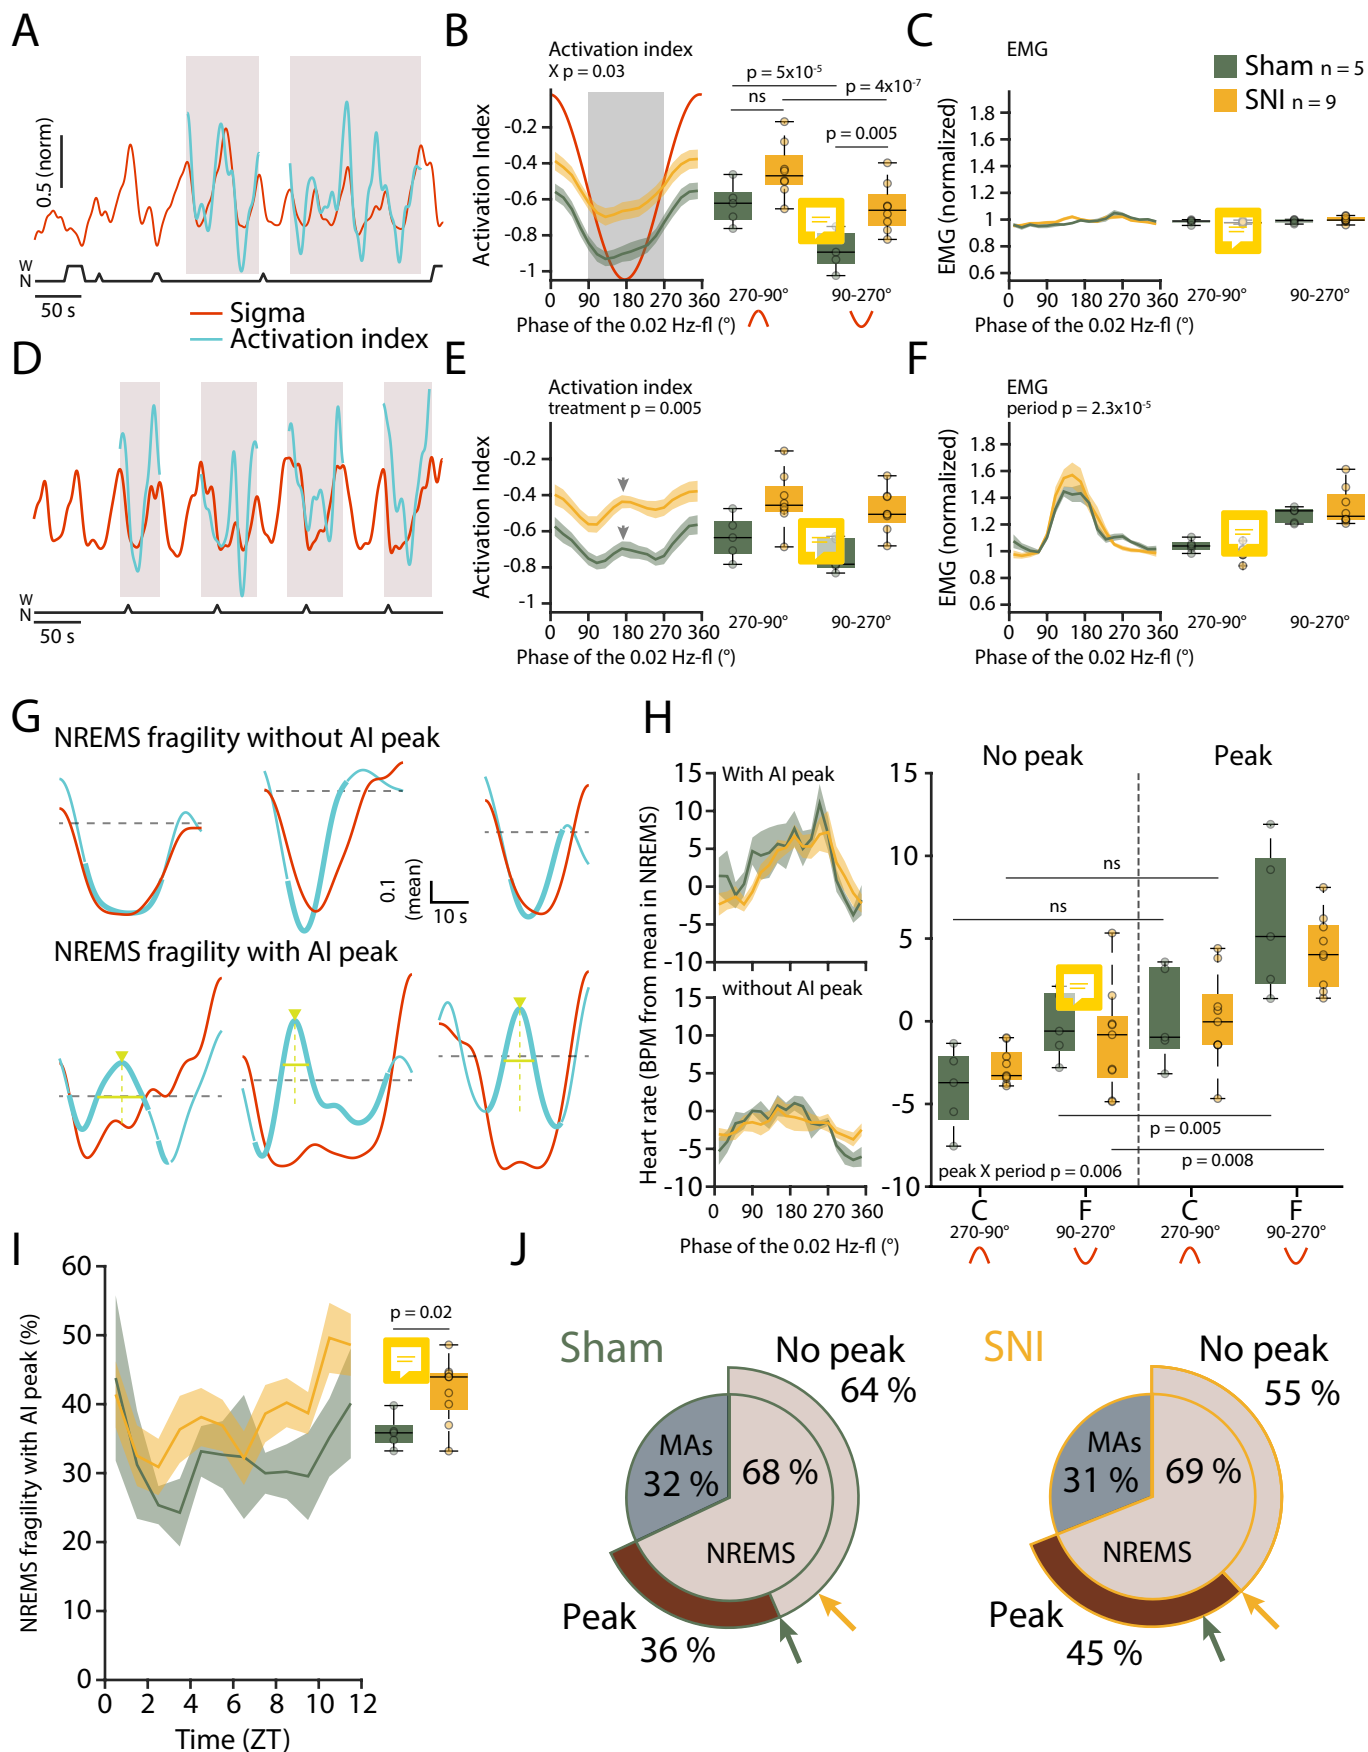

Supplement: fig6-data1 [file elife-65835-fig6-data1-v3.zip]

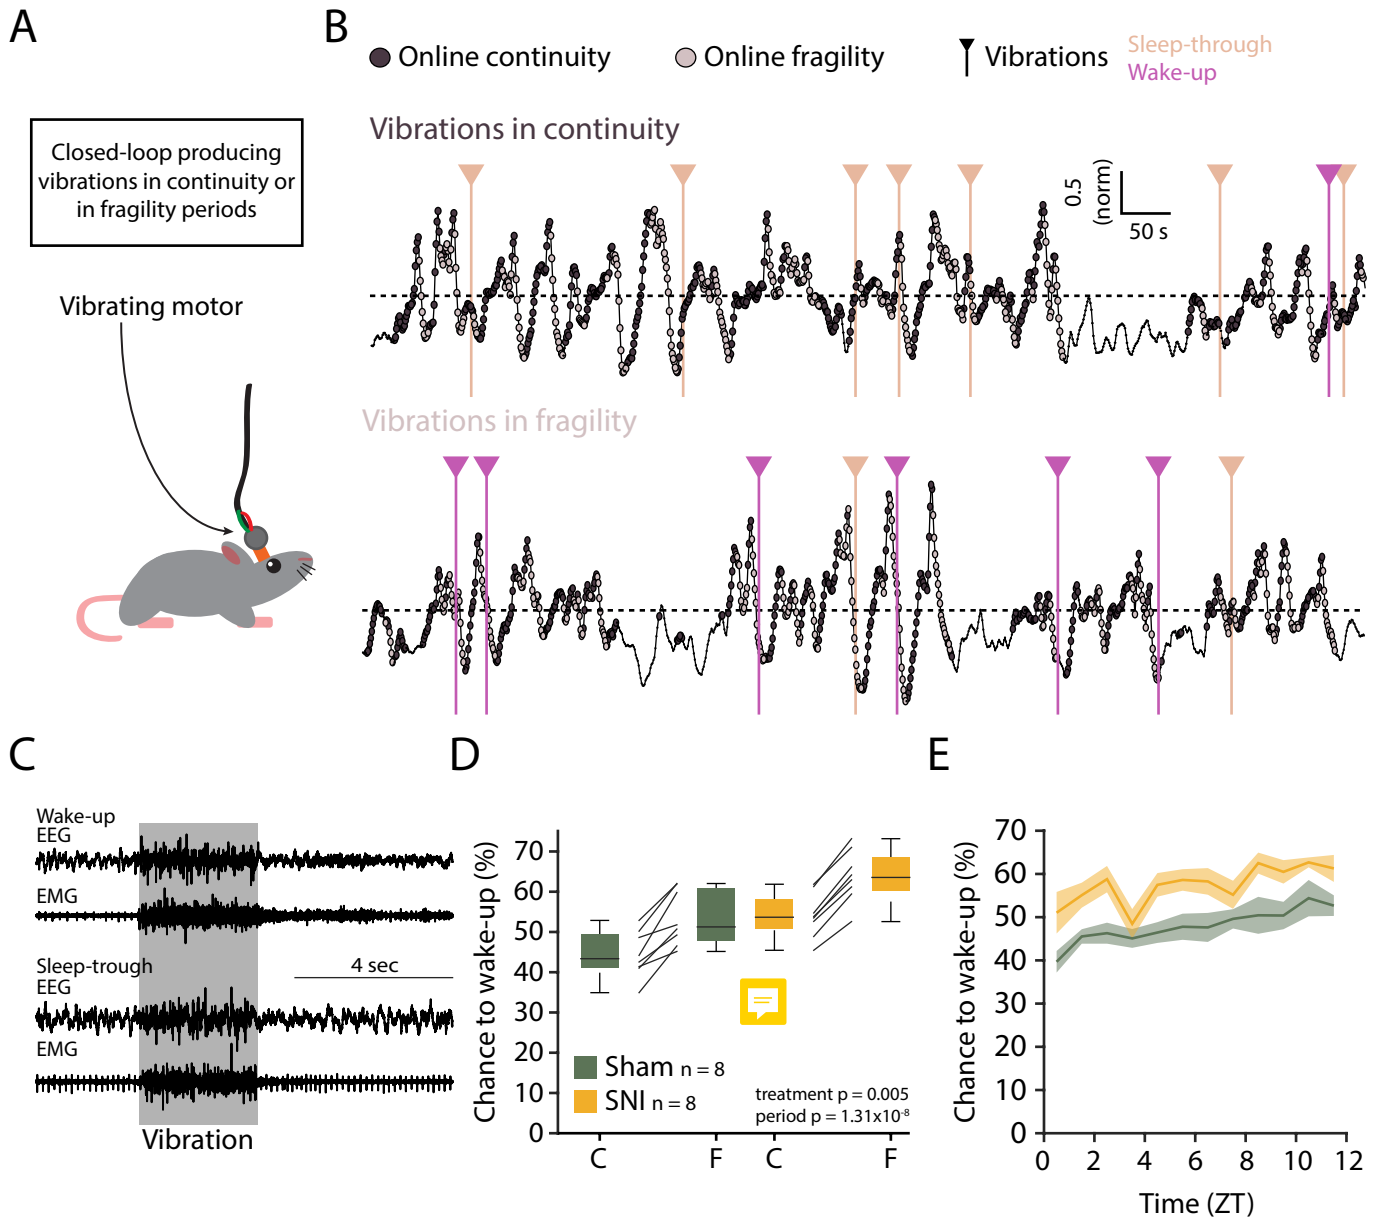

Supplement: fig8-data1 [file elife-65835-fig8-data1-v3.zip]
